# Supplementary material
Source: HighWire-hosted journal article supplement (https://erj.ersjournals.com/content/58/1/2004630)
Supplement: inline-supplementary-material-1 [file inline-supplementary-material-1.pdf]

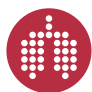

# Moving forward for incidental pulmonary embolism in cancer patients

SHAREABLE PDF

Caio Julio Cesar dos Santos Fernandes <sup>1</sup> and Francis Couturaud<sup>2</sup>

<sup>1</sup>Cardio-Pulmonology, Heart Institute, Sao Paulo, Brazil. <sup>2</sup>Internal Medicine and Chest Diseases, Hopital de la Cavale Blanche, Brest, France.

Corresponding author: Caio Julio Cesar dos Santos Fernandes ([cjcfernandes@yahoo.com.br](mailto:cjcfernandes@yahoo.com.br))

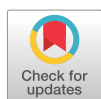

Shareable abstract (@ERSpublications)

**Incidental pulmonary embolism in cancer patients remains a challenge. Since its prognosis appears to differ from symptomatic PE, optimal anticoagulation strategies, including distinct anticoagulant dosage and duration, need to be better elucidated.** <https://bit.ly/3qnycpS>

**Cite this article as:** dos Santos Fernandes CJC, Couturaud F. Moving forward for incidental pulmonary embolism in cancer patients. *Eur Respir J* 2021; 58: 2004630 [DOI: 10.1183/13993003.04630-2020].

This single-page version can be shared freely online.

Copyright ©The authors 2021. For reproduction rights and permissions contact [permissions@ersnet.org](mailto:permissions@ersnet.org)

Received: 24 Dec 2020  
Accepted: 11 Jan 2021

The association between cancer and venous thromboembolism (VTE) has been well known since the 19th century. It was first described by Bouillaud in 1823 [1] but became widely recognised when Trousseau related his “phlegmatia alba dolens” in 1865 and, tragically, succumbed to the condition he described in 1866 [2]. Since then, the epidemiologic relevance of cancer-associated-thrombosis (CAT) has become quite relevant. It is believed that 20% of cancer patients present, during the evolution of the oncologic disease or its treatment, with an episode of VTE [3]. VTE is the second most common cause of death in cancer patients, after cancer progression [4]. Conversely, 20% of all VTE events are CAT [5] and cancer is the most prevalent cause of death in VTE patients [6]. CAT treatment is also not devoid of complexity and presents a challenge in itself. Cancer patients have a three-fold higher VTE recurrence rate than non-cancer patients, but they also present with a two-fold higher major bleeding rate [7].
